# Supplementary material for: Barriers and enablers influencing female athlete return-to-sport postpartum: a scoping review
Source: HighWire-hosted journal article supplement (doi:10.1136/bjsports-2023-107189), 2023-09-27
Supplement: bjsports-2023-107189supp002_data_supplement.pdf [file bjsports-2023-107189supp002_data_supplement.pdf]

**Supplementary Table 1.** Overview of study characteristics from the 22 studies included in this review

| Author (date)                           | Country of origin | Study design                  | Study aim (e.g., to identify, examine, describe, explore, document, report, compare...)                                 | Study population                                                                                                                                     | Population Number | Postpartum period studied | Level of sport athletes returned to postpartum |
|-----------------------------------------|-------------------|-------------------------------|-------------------------------------------------------------------------------------------------------------------------|------------------------------------------------------------------------------------------------------------------------------------------------------|-------------------|---------------------------|------------------------------------------------|
| <b>Quantitative</b>                     |                   |                               |                                                                                                                         |                                                                                                                                                      |                   |                           |                                                |
| Zaharieva (1972) <sup>39</sup>          | Bulgaria          | Self-report/<br>Observational | ... the conditions, effects and outcomes of pregnancy and childbirth                                                    | Elite and first grade athletes active between 1952 and 1972                                                                                          | N=150             | Not reported              | Unclear                                        |
| Nose-Ogura et al., (2023) <sup>40</sup> | Japan             | Survey                        | ... medical problems during pregnancy and postpartum in athletes who aimed to return to competition after childbirth... | Former elite, national, and local level female athletes who became pregnant with their first child and gave birth during their active sports career. | N = 328           | Not reported              | Unknown                                        |
| <b>Qualitative</b>                      |                   |                               |                                                                                                                         |                                                                                                                                                      |                   |                           |                                                |
| Appleby et al., (2009) <sup>12</sup>    | USA               | Interviews                    | ... the experiences of returning to competition following birth                                                         | Elite and national distance runners who returned to the same level of competition                                                                    | N=10              | Not reported              | Elite and National                             |
| Darroch, et al., (2019) <sup>14</sup>   | Canada            | Interviews                    | ... the perceived support of corporate sponsors and athletic governing bodies during and post-pregnancy                 | Elite distance runners who achieved the minimum USA Track and Field 2012 Olympic Trials 'B' entry standard                                           | N=14              | <5 years                  | Unknown                                        |

|                                               |             |                                      |                                                                                                                                                       |                                                                                                            |      |              |                              |
|-----------------------------------------------|-------------|--------------------------------------|-------------------------------------------------------------------------------------------------------------------------------------------------------|------------------------------------------------------------------------------------------------------------|------|--------------|------------------------------|
| Darroch et al., (2017) <sup>16</sup>          | Canada      | Interviews                           | ... the ways motherhood influenced athlete identity; and how motherhood and competition were negotiated                                               | Elite distance runners who achieved the minimum USA 2012 Olympic Trials 'B' entry standard                 | N=14 | <5 years     | Unknown                      |
| Giles et al., (2016) <sup>45</sup>            | Canada      | Interviews                           | ... the experiences of breastfeeding whilst training and competing                                                                                    | Elite distance runners who achieved the minimum USA 2012 Olympic Track and Field Trials 'B' entry standard | N=11 | <5 years     | Unknown                      |
| McGannon et al., (2022) <sup>44</sup>         | Canada      | Interviews                           | ... the experiences of running post-pregnancy                                                                                                         | Competitive distance runners                                                                               | N=5  | Not reported | Unknown                      |
| McGannon et al., (2018) <sup>11</sup>         | Canada      | Interviews                           | ... how athlete and mother identities are negotiated and what implications exist                                                                      | Elite and national level athletes                                                                          | N=7  | Not reported | Unknown                      |
| Palmer et al., (2009) <sup>13</sup>           | New Zealand | Interviews                           | ... how motherhood impacts athlete identity, how mother and athlete identities and roles are negotiated, and what support systems are used or created | Past and present elite mother athletes                                                                     | N=9  | Not reported | Elite (N=7)<br>Unknown (N=2) |
| Tekavc et al., (2020) <sup>41</sup>           | Slovenia    | Interviews                           | ... the transition of athletes into motherhood and how athletes combine their career with being a mother                                              | Elite athletes who returned to elite sport following birth                                                 | N=8  | Not reported | Elite                        |
| Martinez-Pascual et al., (2014) <sup>46</sup> | Spain       | Interviews/<br>Letters/Diary entries | ... the experiences of maternity and sport                                                                                                            | Elite Spanish sportswomen, who                                                                             | N=20 | Not reported | Elite                        |

|                                       |                |                                              |                                                                                                                                                                          |                                                                                                                          |      |              |                                                        |
|---------------------------------------|----------------|----------------------------------------------|--------------------------------------------------------------------------------------------------------------------------------------------------------------------------|--------------------------------------------------------------------------------------------------------------------------|------|--------------|--------------------------------------------------------|
|                                       |                |                                              |                                                                                                                                                                          | returned to sport for at least one year                                                                                  |      |              |                                                        |
| Massey et al., (2022) <sup>48</sup>   | United Kingdom | Interviews                                   | ... how motherhood influences perceived personal and physical identities                                                                                                 | Elite athletes training to return to elite sport postpartum                                                              | N=2  | >2 months    | Currently training to return to elite sport postpartum |
| Freeman (2008) <sup>43</sup>          | USA            | Interviews                                   | ... the experiences of training and competition                                                                                                                          | Elite mother-athletes who gave birth within six years prior to competing in the 2004 Summer or 2006 Winter Olympic Games | N=8  | <6 years     | Elite                                                  |
| Cook (2013) <sup>37</sup>             | Greece         | Interviews                                   | ... the experiences of training and competition                                                                                                                          | An elite athlete who returned to elite sport following birth and her support network (i.e., partner and mother)          | N=3  | Not reported | Elite                                                  |
| Batey et al., (2014) <sup>47</sup>    | United Kingdom | Interviews                                   | ... the sporting experiences and psychological needs of mothers                                                                                                          | National and local mothers who play in team sport                                                                        | N=7  | Not reported | Unknown                                                |
| Debois et al., (2012) <sup>38</sup>   | France         | Interviews                                   | ... key events/transitions periods and how athletes deal with them                                                                                                       | An Elite level female fencer                                                                                             | N=1  | Not reported | Elite                                                  |
| Pedersen (2001) <sup>51</sup>         | Denmark        | Interviews                                   | ... how a sport career and family are combined                                                                                                                           | Elite and national level athletes                                                                                        | N=12 | Not reported | Elite                                                  |
| McGannon et al., (2019) <sup>52</sup> | USA            | Auto-biographical Narrative Inquiry/Analysis | ... what resources were used to construct athlete mother identities, and what social and psychological experiences occurred in relation to training and competition, ... | An elite British runner                                                                                                  | N=1  | Not reported | Elite                                                  |

|                                             |        |                                   |                                                                                                                     |                                                                                   |      |              |                |
|---------------------------------------------|--------|-----------------------------------|---------------------------------------------------------------------------------------------------------------------|-----------------------------------------------------------------------------------|------|--------------|----------------|
| Baldwin (2022) <sup>50</sup>                | USA    | Narrative Inquiry/Analysis        | what is normalized and obscured in three media representations of mother runners                                    | Elite and recreational mother runners                                             | N/A  | Not reported | Not applicable |
| Davenport et al., (2022) <sup>15</sup>      | Canada | Interviews                        | ... experiences of returning to sport following childbirth                                                          | World class and elite level athletes                                              | N=18 | <5 years     | Elite          |
| Mixed Methods                               |        |                                   |                                                                                                                     |                                                                                   |      |              |                |
| Beilock et al., (2001) <sup>49</sup>        | USA    | Cross-sectional Survey/Interviews | ... the physiological and cognitive components mediating a successful return to training and competition postpartum | National to local level athletes with 4+ years competitive experience             | N=26 | <10 years    | Unknown        |
| Sundgot-Borgen et al., (2019) <sup>42</sup> | Norway | Cross-sectional Survey/Interviews | ... the conditions and outcomes of pregnancy, childbirth, and the postpartum period                                 | Elite level athletes who aimed to return to the same level competition postpartum | N=34 | <1 years     | Unknown        |

Level of sport informed by McKay et al., (2021): A Participant Classification Framework.<sup>74</sup>
