# Supplementary material for: Barriers and enablers influencing female athlete return-to-sport postpartum: a scoping review
Source: HighWire-hosted journal article supplement (doi:10.1136/bjsports-2023-107189), 2023-09-27
Supplement: bjsports-2023-107189supp004_data_supplement.pdf [file bjsports-2023-107189supp004_data_supplement.pdf]

**Supplementary Table 3.** *Identified enablers influencing female athletes return-to-sport postpartum*

| CATEGORIES                                             | IDENTIFIED ENABLERS                                                                                                                                                                                                                                                                                                                                                                                                                                                                                                                                                                                                                                                                                                                                           |
|--------------------------------------------------------|---------------------------------------------------------------------------------------------------------------------------------------------------------------------------------------------------------------------------------------------------------------------------------------------------------------------------------------------------------------------------------------------------------------------------------------------------------------------------------------------------------------------------------------------------------------------------------------------------------------------------------------------------------------------------------------------------------------------------------------------------------------|
| <b>INDIVIDUAL</b>                                      |                                                                                                                                                                                                                                                                                                                                                                                                                                                                                                                                                                                                                                                                                                                                                               |
| <b>Physiological</b>                                   |                                                                                                                                                                                                                                                                                                                                                                                                                                                                                                                                                                                                                                                                                                                                                               |
| Physiological                                          | Improvements in physique; <sup>48</sup> reduced weight gain/weight loss postpartum; <sup>37</sup> achieving similar results as pre-pregnancy <sup>37</sup>                                                                                                                                                                                                                                                                                                                                                                                                                                                                                                                                                                                                    |
| <b>Attitudinal</b>                                     |                                                                                                                                                                                                                                                                                                                                                                                                                                                                                                                                                                                                                                                                                                                                                               |
| Physiological                                          | Feelings of improved physical fitness, stamina, and skill; <sup>39</sup> increased confidence in physical capabilities; <sup>44</sup> feeling strong <sup>15</sup>                                                                                                                                                                                                                                                                                                                                                                                                                                                                                                                                                                                            |
| Pride and satisfaction                                 | Self-pride in accomplishments; <sup>12 43</sup> being satisfied with training efforts and performances <sup>37</sup>                                                                                                                                                                                                                                                                                                                                                                                                                                                                                                                                                                                                                                          |
| Self-awareness                                         | Increased intuition with body; <sup>41</sup> being physically aware of self; <sup>37</sup> increased intuition regarding running/performance <sup>44</sup>                                                                                                                                                                                                                                                                                                                                                                                                                                                                                                                                                                                                    |
| Enjoyment, passion, motivation, and important for self | Enjoyment for sport/enjoying sport; <sup>49</sup> feeling refreshed/motivated and experiencing enjoyment upon return; <sup>38 43</sup> having a strong passion for sport; <sup>13</sup> motivation to return/continue; <sup>38 41 43</sup> being motivated and having confidence in ability to return; <sup>37</sup> motivation (to make the most of time and effort); <sup>46</sup> being motivated (to train/compete); <sup>49</sup> sport = personal pleasure, personal time, and enjoyment; <sup>12</sup> important for self-care; <sup>44</sup> sport as leisure; <sup>13</sup> sport as important to self; <sup>11 47</sup> sport as time off/away from being a mother; <sup>41</sup> being part of a team deemed important for wellbeing <sup>37</sup> |
| Reciprocity                                            | Positive changes to motherhood and sport; <sup>16</sup> reciprocity between motherhood and sport; <sup>44</sup> sport a positive influence on motherhood; <sup>13</sup> sport able to benefit family (e.g., child able to see different places); <sup>41</sup> sport beneficial to motherhood; <sup>43</sup> desire to be role model (for children and athletes); <sup>12</sup> being/considering self as a role model <sup>16 37</sup>                                                                                                                                                                                                                                                                                                                       |
| Expectations                                           | Having lessened expectations of self/not having to prove oneself to others; <sup>12</sup> not having preconceived expectations on self; <sup>44</sup> keeping an open mind about one's ability to train and be a mother; <sup>43</sup> ability to manage expectations of physical capabilities (by listening to body); <sup>44</sup> feelings of not being forced to choose between motherhood and running/making a team <sup>12</sup>                                                                                                                                                                                                                                                                                                                        |
| Identity, priority, and/or perspective                 | Having another identity besides 'runner'; <sup>12</sup> change in priority; <sup>12 15</sup> prioritizing children over running; <sup>16</sup> change in perspective/change in priorities; <sup>13</sup> change in perspective; <sup>41 43 44 46</sup> viewing motherhood and sport as 'less contradictory'; <sup>12</sup> changing outlook/adopting a 'go with the flow mind-set'; <sup>52</sup> maintaining a strong athletic identity <sup>37</sup>                                                                                                                                                                                                                                                                                                        |

|                                            |                                                                                                                                                                                                                                                                                                                                                                                                                                                                                                                                                                                                                                                                                                                                                                                                                                                                                                                                                                                                                                                                                                                                                                                                                                                                    |
|--------------------------------------------|--------------------------------------------------------------------------------------------------------------------------------------------------------------------------------------------------------------------------------------------------------------------------------------------------------------------------------------------------------------------------------------------------------------------------------------------------------------------------------------------------------------------------------------------------------------------------------------------------------------------------------------------------------------------------------------------------------------------------------------------------------------------------------------------------------------------------------------------------------------------------------------------------------------------------------------------------------------------------------------------------------------------------------------------------------------------------------------------------------------------------------------------------------------------------------------------------------------------------------------------------------------------|
| Adapting emotions and stereotypes          | Ability to resolve divergent/negative feelings; <sup>12 37</sup> ability to omit/overcome negative perceptions; <sup>41</sup> ability to resist stereotypes of motherhood; <sup>43</sup> need/ability to justify return; <sup>46</sup> having strong self-efficacy <sup>49</sup>                                                                                                                                                                                                                                                                                                                                                                                                                                                                                                                                                                                                                                                                                                                                                                                                                                                                                                                                                                                   |
| <b>Strategical</b>                         |                                                                                                                                                                                                                                                                                                                                                                                                                                                                                                                                                                                                                                                                                                                                                                                                                                                                                                                                                                                                                                                                                                                                                                                                                                                                    |
| Planning pregnancy, childbirth, and return | Planning pregnancy and childbirth (i.e., to ensure financial stability; <sup>16</sup> to limit impact on sport goals; <sup>13</sup> to coincide after competitions and allow recovery; <sup>41 43</sup> get back into shape); <sup>43</sup> planning how to train and juggle child/athlete/mother responsibilities (before baby arrives); <sup>43</sup> having a ‘comeback’ plan <sup>37</sup>                                                                                                                                                                                                                                                                                                                                                                                                                                                                                                                                                                                                                                                                                                                                                                                                                                                                     |
| Ability to manage roles                    | Ability to adjust training/competitions to juggle family time; <sup>44</sup> configuring training so not wasting time away from family; <sup>51</sup> setting training around child’s needs (e.g., modifying training based on child’s needs); <sup>52</sup> adjusting schedules to relieve workload; <sup>38</sup> ability to compromise, and finding ways to fulfill demands of being a mother and athlete; <sup>41</sup> ability to balance the needs of family with the needs/expectations of coach and teammates and sport organisation; <sup>43</sup> learning how to balance/negotiate motherhood with being an athlete; <sup>46</sup> ability to develop childcare strategies; <sup>16</sup> ability to compartmentalise or combine mother and athlete roles; <sup>13 15</sup> ability to separate and integrate mother/athlete identities; <sup>48</sup> ability to negotiate/integrate family and sport; <sup>43</sup> ability to compartmentalise roles; <sup>37</sup> integrating sport/training with family (e.g., children attending training); <sup>52</sup> being organised; <sup>37</sup> ability to balance training and desired breastfeeding practices (e.g., expressing breast milk); <sup>15 45</sup> using a day-care service <sup>49</sup> |
| Training                                   | Maintaining exercise and fitness (through pregnancy); <sup>41 52</sup> taking a gradual and individualized approach to training; <sup>41</sup> early return-to-sport/competition postpartum; <sup>48</sup> using a back to basics/simplified training approach; <sup>52</sup> making training a priority; <sup>49</sup> making time for training; <sup>49</sup> putting in effort at training (note: training effort increased perceived competitive success postpartum) <sup>49</sup>                                                                                                                                                                                                                                                                                                                                                                                                                                                                                                                                                                                                                                                                                                                                                                             |
| Other                                      | Cultivating support networks (for help); <sup>43</sup> taking on additional paid work (to receive maternity leave) <sup>16</sup>                                                                                                                                                                                                                                                                                                                                                                                                                                                                                                                                                                                                                                                                                                                                                                                                                                                                                                                                                                                                                                                                                                                                   |
| <b>INTRAPERSONAL</b>                       |                                                                                                                                                                                                                                                                                                                                                                                                                                                                                                                                                                                                                                                                                                                                                                                                                                                                                                                                                                                                                                                                                                                                                                                                                                                                    |
| <b>Social Support</b>                      |                                                                                                                                                                                                                                                                                                                                                                                                                                                                                                                                                                                                                                                                                                                                                                                                                                                                                                                                                                                                                                                                                                                                                                                                                                                                    |
| Childcare                                  | Partner support (childcare); <sup>37 38 43 47 49</sup> parent support (availability and understanding with childcare); <sup>37 38 41 43 47</sup> friends or community (i.e., neighbours) as secondary childcare providers <sup>43</sup>                                                                                                                                                                                                                                                                                                                                                                                                                                                                                                                                                                                                                                                                                                                                                                                                                                                                                                                                                                                                                            |
| Emotional                                  | Having a family/supportive partner (with a job); <sup>12</sup> partner/spouse for emotional support; <sup>16 43</sup> partner support and understanding (i.e., the importance of sport) <sup>41 47</sup>                                                                                                                                                                                                                                                                                                                                                                                                                                                                                                                                                                                                                                                                                                                                                                                                                                                                                                                                                                                                                                                           |

|                                 |                                                                                                                                                                                                                                                                                                                                                                                                                                                                                                                                                                                                                                                                                                                                                                                                                                                                                                  |
|---------------------------------|--------------------------------------------------------------------------------------------------------------------------------------------------------------------------------------------------------------------------------------------------------------------------------------------------------------------------------------------------------------------------------------------------------------------------------------------------------------------------------------------------------------------------------------------------------------------------------------------------------------------------------------------------------------------------------------------------------------------------------------------------------------------------------------------------------------------------------------------------------------------------------------------------|
| Financial                       | Relying on partner/spouse for financial support (income); <sup>16</sup> friends/community members to help financially (e.g., by hosting fund raisers) <sup>43</sup>                                                                                                                                                                                                                                                                                                                                                                                                                                                                                                                                                                                                                                                                                                                              |
| Other                           | Having an egalitarian relationship <sup>52</sup>                                                                                                                                                                                                                                                                                                                                                                                                                                                                                                                                                                                                                                                                                                                                                                                                                                                 |
| <b>ORGANISATIONAL</b>           |                                                                                                                                                                                                                                                                                                                                                                                                                                                                                                                                                                                                                                                                                                                                                                                                                                                                                                  |
| <b>Time</b>                     |                                                                                                                                                                                                                                                                                                                                                                                                                                                                                                                                                                                                                                                                                                                                                                                                                                                                                                  |
| Time                            | Having enough time to recover postpartum/regain fitness <sup>15 42</sup>                                                                                                                                                                                                                                                                                                                                                                                                                                                                                                                                                                                                                                                                                                                                                                                                                         |
| <b>Social Support</b>           |                                                                                                                                                                                                                                                                                                                                                                                                                                                                                                                                                                                                                                                                                                                                                                                                                                                                                                  |
| Coach                           | Coach belief that a return is possible; <sup>37</sup> coach support (understanding mother responsibilities and helping to combine roles); <sup>41</sup> coach support (emotional support, encouragement, and assisting the participants in balancing their parenting and sport responsibilities by being flexible with training and competition schedules); <sup>43</sup> having partner as coach (allowed for greater flexibility, support and understanding of mother responsibilities) <sup>52</sup>                                                                                                                                                                                                                                                                                                                                                                                          |
| Teammates                       | Teammate support (important for social, emotional, childcare and training support); <sup>43</sup> having other athletes for knowledge/advice (i.e., breastfeeding and training); <sup>45</sup> having a team to train with (motivation); <sup>49</sup> team supportive of athlete bringing their baby to training <sup>15</sup>                                                                                                                                                                                                                                                                                                                                                                                                                                                                                                                                                                  |
| <b>Policy</b>                   |                                                                                                                                                                                                                                                                                                                                                                                                                                                                                                                                                                                                                                                                                                                                                                                                                                                                                                  |
| Encouragement                   | Providing athletes with encouragement and invitations to return <sup>13</sup>                                                                                                                                                                                                                                                                                                                                                                                                                                                                                                                                                                                                                                                                                                                                                                                                                    |
| Recognition and understanding   | Being open (receptive) and understanding of mother-athlete needs; <sup>13</sup> recognising motherhood; <sup>43</sup> amendment of organisational attitudes regarding motherhood (e.g., eliminate perception of exclusivity/incompatibility) <sup>43</sup>                                                                                                                                                                                                                                                                                                                                                                                                                                                                                                                                                                                                                                       |
| Financial and childcare support | Receiving Government financial support (i.e., maternity leave); <sup>41</sup> providing athletes with childcare accommodations (e.g., assisting with childcare expenses; <sup>43</sup> paying parents' hotel room so they could provide childcare at training camp/driving athlete back to the hotel to breastfeed/allow athlete extra time before games to pump); <sup>15</sup> a model of support that encompasses greater legal and financial protections, and equitable policy; <sup>14</sup> funding to support time to recover from childbirth and return-to-sport (e.g., maternity leave); <sup>15</sup> funding (support paying) for childcare; <sup>15</sup> support for planning and funding family travel (including allowing athletes to remain/be in contact with their families whilst training and competing; and providing athletes with childcare accommodations) <sup>43</sup> |
| Return-to-sport guidance        | A return-to-sport plan that is co-developed by the athlete, coach, and healthcare provider; <sup>15</sup> obstetrician/gynaecologist guidance <sup>40</sup>                                                                                                                                                                                                                                                                                                                                                                                                                                                                                                                                                                                                                                                                                                                                      |
