# Supplementary material for: Barriers and enablers influencing female athlete return-to-sport postpartum: a scoping review
Source: HighWire-hosted journal article supplement (doi:10.1136/bjsports-2023-107189), 2023-09-27
Supplement: bjsports-2023-107189supp005_data_supplement.pdf [file bjsports-2023-107189supp005_data_supplement.pdf]

**Supplementary Table 4.** Recommendations for policy as well as clinicians and sport organisations to support female athletes to return-to-sport postpartum.

| Recommendations for sport organisation policy to support female athletes in their return-to-sport postpartum                                                                                                                                                                                                                                                                                                                                                                                                                                                                                                                                                                                                                                                                                                                                                                                                                                                                                                                                                                                                                                                                                                                                                                                                                                                                                                                                                                                                                                           | Level of sport | Role     |
|--------------------------------------------------------------------------------------------------------------------------------------------------------------------------------------------------------------------------------------------------------------------------------------------------------------------------------------------------------------------------------------------------------------------------------------------------------------------------------------------------------------------------------------------------------------------------------------------------------------------------------------------------------------------------------------------------------------------------------------------------------------------------------------------------------------------------------------------------------------------------------------------------------------------------------------------------------------------------------------------------------------------------------------------------------------------------------------------------------------------------------------------------------------------------------------------------------------------------------------------------------------------------------------------------------------------------------------------------------------------------------------------------------------------------------------------------------------------------------------------------------------------------------------------------------|----------------|----------|
| <b><i>Sport organisation policy:</i></b>                                                                                                                                                                                                                                                                                                                                                                                                                                                                                                                                                                                                                                                                                                                                                                                                                                                                                                                                                                                                                                                                                                                                                                                                                                                                                                                                                                                                                                                                                                               |                |          |
| Establish / update maternity leave policy inclusive of: <ul style="list-style-type: none"> <li>• adequate time to recover physically and physiologically (at least 3 months, ideally 6-12 months)</li> <li>• financial support and security</li> <li>• job security</li> <li>• travel support for carer and child for all domestic and international travel</li> <li>• athlete and organisation expectations and responsibilities during maternity leave (e.g., athlete access to and organisation provision of support services such as team doctor or team physiotherapist, training requirements of athlete, communication, contact and engagement)</li> <li>• a requirement that athlete, organisation and staff (e.g., team doctor, coach) co-design individualised return-to-sport postpartum plan that is frequently reviewed and updated to provide athlete and organisation clear pathway forward</li> <li>• Individualised plan should address each of all the above points, as well as any other important considerations (e.g., training schedule, considerations for return to training such as breastfeeding, developing home-based training program as athlete unable to access childcare on certain days) to ensure ‘holistic’ support is provided to athlete</li> <li>• a clause that enables athletes to use funding for ‘maternity/motherhood’ relevant expenses (e.g., babysitting, childcare, cleaning the house) during maternity leave and/or up until specified timeframe (at least 3 months, ideally 12-24 months)</li> </ul> | P/SA - INT     | SO       |
| Establish / update return-to-sport protocol to include return-to-sport postpartum. Protocol should be individualised, co-designed, co-delivered and systematically build athletic capacity through specific and measurable goals (e.g., 6Rs Framework)                                                                                                                                                                                                                                                                                                                                                                                                                                                                                                                                                                                                                                                                                                                                                                                                                                                                                                                                                                                                                                                                                                                                                                                                                                                                                                 | P/SA - INT     | SO & CLI |

|                                                                                                                                                                                                                                                                                                                                                                                                                              |               |             |
|------------------------------------------------------------------------------------------------------------------------------------------------------------------------------------------------------------------------------------------------------------------------------------------------------------------------------------------------------------------------------------------------------------------------------|---------------|-------------|
| Establish / update relevant organisation policy to recognise, be inclusive and supportive of postpartum athletes (e.g., diversity, equity and inclusion)                                                                                                                                                                                                                                                                     | LOC -<br>INT  | SO          |
| Establish / update policy to protect and not penalise athletes for taking a leave due to pregnancy/childbirth or whilst returning to sport postpartum (e.g., lose position, remittance or ranking)                                                                                                                                                                                                                           | LOC -<br>INT  | SO          |
| Establish / update policy that requires/encourages sporting venues provide a private space for mothers to breastfeed and access to relevant amenities (e.g., change table, toilet cubicles large enough to fit stroller/pram, uni-sex toilets for carers, access to a microwave that can be utilised by mothers/carers to warm food and drink)                                                                               | LOC -<br>INT  | SO          |
| <b>Additional considerations for clinicians and sport organisations to support female athletes to successfully return-to-sport postpartum</b>                                                                                                                                                                                                                                                                                |               |             |
| <b><i>Postpartum recovery time:</i></b>                                                                                                                                                                                                                                                                                                                                                                                      |               |             |
| Co-design (athlete, team clinician and coach) a structured and individualised training program that accounts for unique postpartum considerations (e.g., vaginal v cesarean delivery)                                                                                                                                                                                                                                        | P/SA -<br>INT | SO &<br>CLI |
| Regularly screen the physical (e.g., bleeding, pain, incontinence, heaviness, prolapse, diastasis), physiological and psychological health of athletes (e.g., sleep, fatigue, breastfeeding, hormonal changes, exercise tolerance, psychological wellbeing) and factor negative implications into their return (e.g., whether athletes will require greater recovery time, revised trainings, or additional medical support) | LOC -<br>INT  | CLI         |
| Provide and facilitate educational opportunities to enhance knowledge and understanding of physical, physiological, and psychological changes that occur during pregnancy and how these changes may influence/impact return-to-sport postpartum among athletes, sport organisation staff (e.g., coaches) and healthcare professionals (e.g., team doctors)                                                                   | LOC -<br>INT  | SO          |
| <b><i>Time to manage motherhood and sport demands:</i></b>                                                                                                                                                                                                                                                                                                                                                                   |               |             |
| Inform athletes of relevant schedules and any other requirements (e.g., training times, dates, and travel for competition) as early as possible to enable postpartum athletes time to plan and make arrangements                                                                                                                                                                                                             | LOC -<br>INT  | SO          |
| Assist athletes to develop strategies to manage motherhood and sport demands (e.g., identify local childcare facilities close to training venue to reduce time required to drop off/pick up child/ren, link athlete with nutritionist to identify opportunities to increase efficiency of food prep)                                                                                                                         | P/SA -<br>INT | SO &<br>CLI |
| Provide athletes with flexible training program (e.g., increased duration to allow for breastfeeding breaks) and access to flexible support services (e.g., telehealth appointments, home visits instead of clinical visits)                                                                                                                                                                                                 | P/SA -<br>INT | SO &<br>CLI |
| <b><i>Stereotypes:</i></b>                                                                                                                                                                                                                                                                                                                                                                                                   |               |             |

|                                                                                                                                                                                                                                                                                                                                                                                                                                                                                                                                                                                                                                                                                                                                                                                                                                                                                                                                                                      |               |             |
|----------------------------------------------------------------------------------------------------------------------------------------------------------------------------------------------------------------------------------------------------------------------------------------------------------------------------------------------------------------------------------------------------------------------------------------------------------------------------------------------------------------------------------------------------------------------------------------------------------------------------------------------------------------------------------------------------------------------------------------------------------------------------------------------------------------------------------------------------------------------------------------------------------------------------------------------------------------------|---------------|-------------|
| Educate athletes and sport organisation staff about the cultural and social norms/pressures of parenthood, stereotyping and bias (subconscious and intentional) and how these can affect/influence athletes postpartum (e.g., the ‘good mother’ ideology, guilt, low confidence, performance, motivation).                                                                                                                                                                                                                                                                                                                                                                                                                                                                                                                                                                                                                                                           | LOC -<br>INT  | SO &<br>CLI |
| Develop education and training resources to build awareness and understanding of cultural and social norms/pressures and stereotyping and biases of parenthood and how this can affect/influence athletes postpartum                                                                                                                                                                                                                                                                                                                                                                                                                                                                                                                                                                                                                                                                                                                                                 | P/SA -<br>INT | SO          |
| Support athletes who lack confidence and self-efficacy in relation to sport and motherhood by referring to relevant healthcare professionals for additional support (e.g., women’s health physiotherapist, lactation consultants, exercise physiologists, nutritionists, psychologists)                                                                                                                                                                                                                                                                                                                                                                                                                                                                                                                                                                                                                                                                              | P/SA -<br>INT | SO &<br>CLI |
| Develop a culture that supports postpartum athletes: <ul style="list-style-type: none"> <li>• Limit discrimination/bias toward postpartum athletes (e.g., athlete not selected in team based on assumed inability to commit to training schedule or perform at pre-pregnancy level, not appointed to leadership position / removal from leadership position based on assumed lack of commitment)</li> <li>• Normalise motherhood and sport by showcasing, promoting, and celebrating mothers in sport</li> <li>• Support athletes to integrate sport with motherhood (e.g., allow child/ren to travel and stay with athletes during domestic and international travel, and provide facility amenities (e.g., parenting room to breastfeed, equipped with change table and toilet, safe play area)</li> <li>• Be considerate of childcare responsibilities when planning training (e.g., training outside of childcare hours), team engagements and events</li> </ul> | LOC -<br>INT  | SO          |
| <b><i>Social support:</i></b>                                                                                                                                                                                                                                                                                                                                                                                                                                                                                                                                                                                                                                                                                                                                                                                                                                                                                                                                        |               |             |
| Provide a child-friendly environment (e.g., allow child/ren to attend team meetings, engagements, and events)                                                                                                                                                                                                                                                                                                                                                                                                                                                                                                                                                                                                                                                                                                                                                                                                                                                        | LOC -<br>INT  | SO          |
| Assist athletes to establish support networks (e.g., link with support services such as mothers’ groups, childcare, healthcare professionals) and planning (e.g., who will watch child/ren for training this week)                                                                                                                                                                                                                                                                                                                                                                                                                                                                                                                                                                                                                                                                                                                                                   | LOC -<br>INT  | SO &<br>CLI |
| Foster and facilitate support networks for postpartum athletes (e.g., allow access to facilities such as meeting room / venue for mothers’ group to meet and resources such as gym or court/field to train with child/ren)                                                                                                                                                                                                                                                                                                                                                                                                                                                                                                                                                                                                                                                                                                                                           | LOC -<br>INT  | SO          |

Level of Sport: informed by McKay et al., (2021) A Participant Classification Framework.<sup>74</sup>

P/SA = Provincial/State or Academy, INT = International, LOC = Local.

Role / Responsibility: CLI = Clinician/s, SO = Sport Organisation.
